# Supplementary material for: Extracellular vesicle mediated feto-maternal HMGB1 signaling induces preterm birth
Source: Royal Society of Chemistry journal article supplement (doi:10.1039/d0lc01323d), 2021-01-01
Supplement: d0lc01323d3.pdf [file d0lc01323d3.pdf]

**a**

**See video file:  
Sup. Figure-2 a**

**b**

**See video file:  
Sup. Figure-2 b**
