# Supplementary material for: Extracellular vesicle mediated feto-maternal HMGB1 signaling induces preterm birth
Source: Royal Society of Chemistry journal article supplement (doi:10.1039/d0lc01323d), 2021-01-01
Supplement: d0lc01323d13.pdf [file d0lc01323d13.pdf]

## SUPPLEMENTAL FIGURES

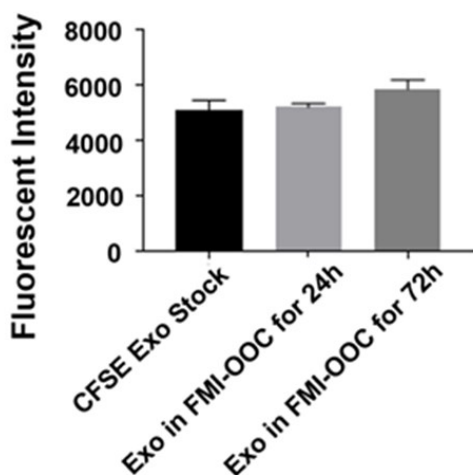

**Supplementary Fig.1** Fluorescently labeled exosomes trafficking through the layers of cell lines in FMI-OOC device.

Fluorescent plate reader measured CFSE-labeled fluorescent exosome concentrations within the FMI-OOC, showing no difference over 72 h period, indicating no or limited absorption of exosomes to the PDMS device or reservoir system ( $n = 3$ ). Values are expressed as means  $\pm$  SEM.

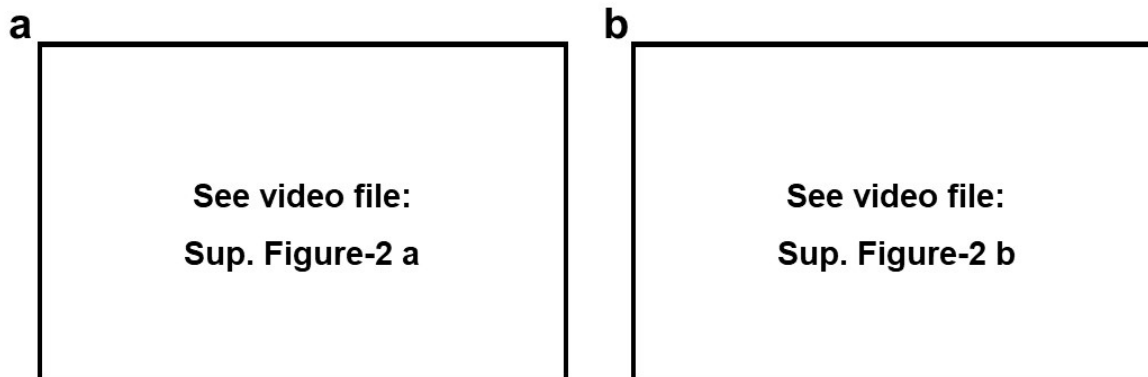

**Supplementary Fig.2** Time-lapse movie of transiently expressed HMGB1-GFP colocalization with CD9-RFP in amnion epithelial cells (CD9-RFP-AECs) under oxidative stress condition. **(a)** Transiently expressed HMGB1-GFP translocation into the cytoplasm

against oxidative stress (OS) induction by cigarette smoke extract (CSE) within 24 h. **(b)** Colocalization of HMGB1-GFP with CD9-RFP in AECs induced by OS. Time-lapse captured for 24 h with Keyence microscope.

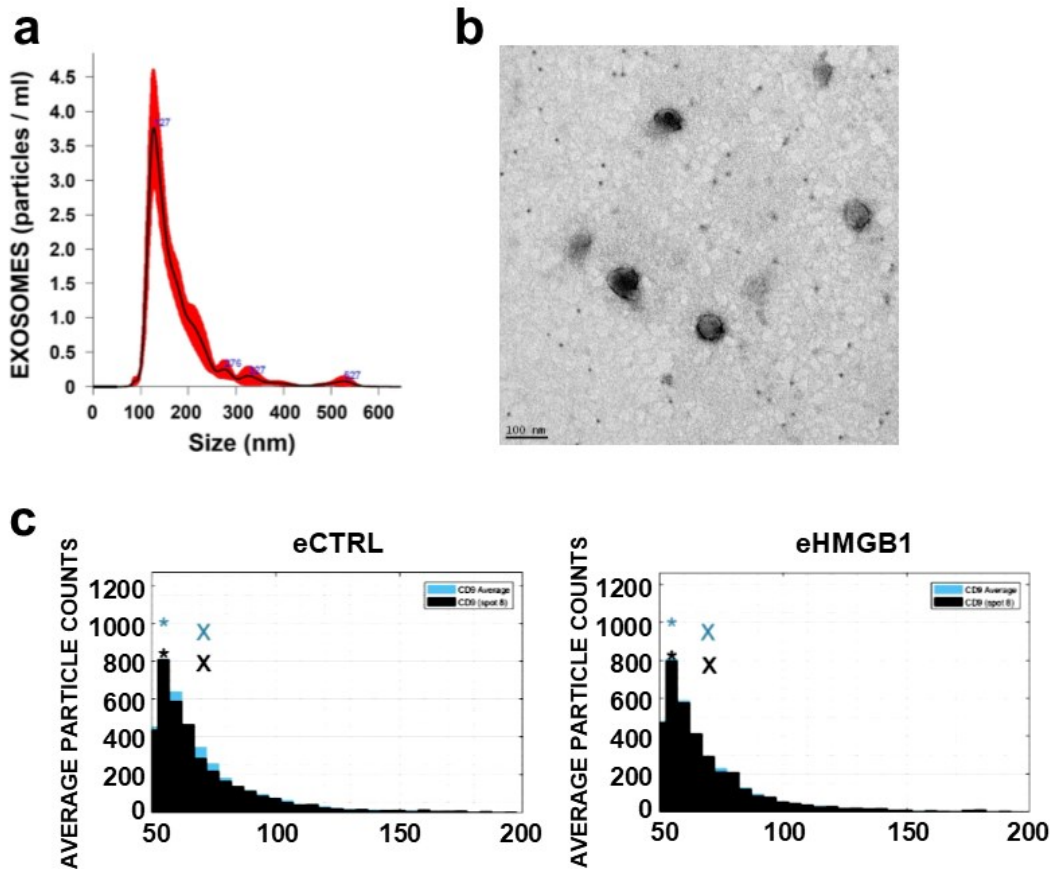

**Supplementary Fig.3 Characterization of AEC-derived exosomes.** **(a)** Size distribution of AEC-derived exosomes before electroporation with nanoparticle tracking analysis (NTA) (n=5). **(b)**. Representative wide-field transmission electron microscopy (TEM) images of AEC-derived exosomes before electroporation (N=3). **(c)** Representative graphs of engineered eCTRL and eHMGB1 CD9-captured exosomes

size distribution by ExoView analysis.

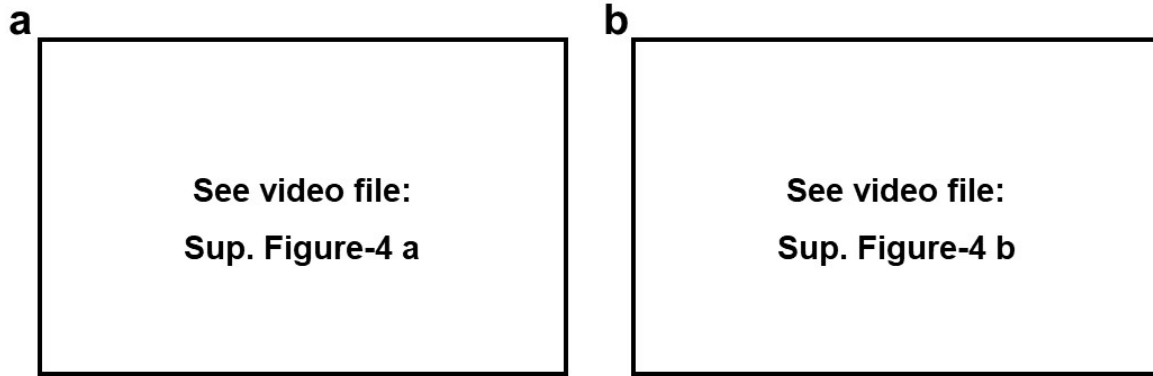

**Supplementary Fig.4** Exosomes trafficking through the layers of cell lines in FMI-OOC device. **(a)** Time-lapse movies of endogenous and exogenous exosomes trafficking across cell layers. **(b)** movie merged with phase contrast. Scale Bars, 50  $\mu$ m.

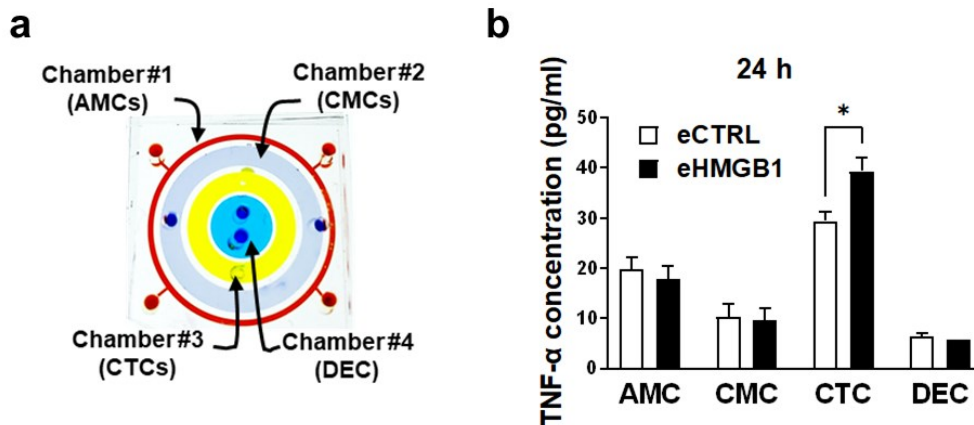

**Supplementary Fig.S5** Engineered HMGB1-exosomes trafficking initiates the activation of inflammatory cytokine production throughout fetal membrane cells

**(a)** Image of the FMI-OOC for inflammation propagation study. AMCs (chamber 1), CMCs (chamber 2), CTCs (chamber 3) and DEC (chamber 4) were seeded as indicated. **(b)** Secreted cytokine TNF- $\alpha$  level was measured by immunoassay using the culture media from 24 h treatment (n=3). The data is presented as the means  $\pm$  SEM. \*P < 0.05, two-way analysis of variance (ANOVA).

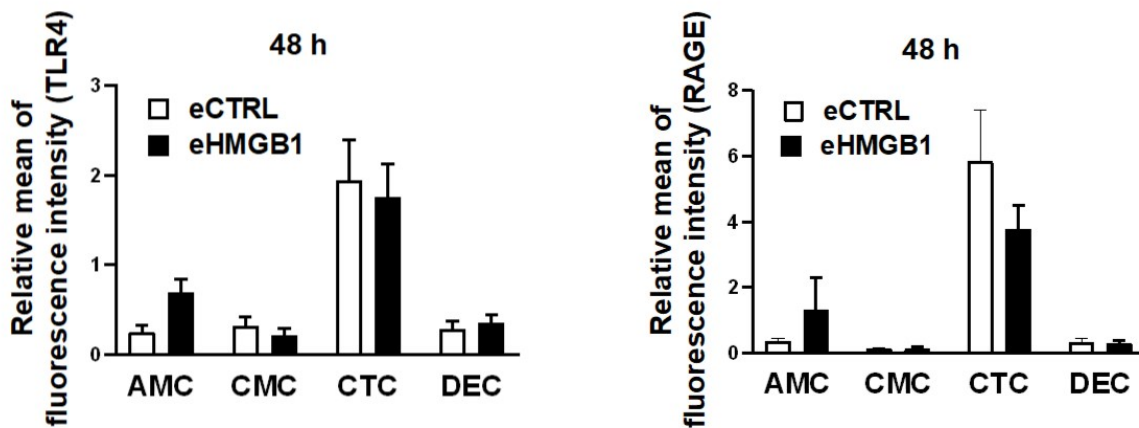

**Supplementary Fig.S6 Engineered HMGB1-exosomes trafficking is blocked no channel FMI-OOC devices.** Fluorescence signal intensity of TLR4 and RAGE expression was measured at indicated time periods by ImageJ (n=3). The data is presented as the means  $\pm$  SEM. two-way analysis of variance (ANOVA).

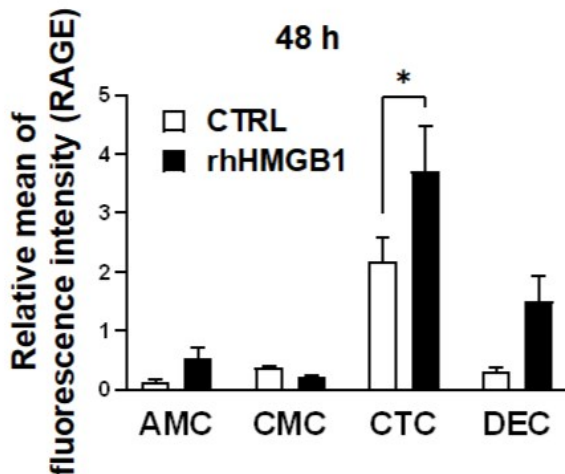

**Supplementary Fig.S7 rhHMGB1 treatment induced RAGE expression in FMI-OOC devices.** Fluorescence signal intensity of RAGE expression was measured at 48 h by ImageJ (n=3). The data is presented as the means  $\pm$  SEM.  $P=0.016$ , two-way analysis of variance (ANOVA).
