# Supplementary figures and images for: Extracellular vesicle mediated feto-maternal HMGB1 signaling induces preterm birth
Source: Royal Society of Chemistry journal article supplement (doi:10.1039/d0lc01323d), 2021-01-01

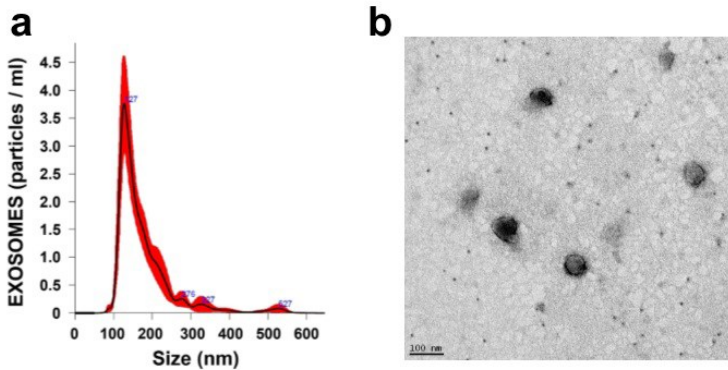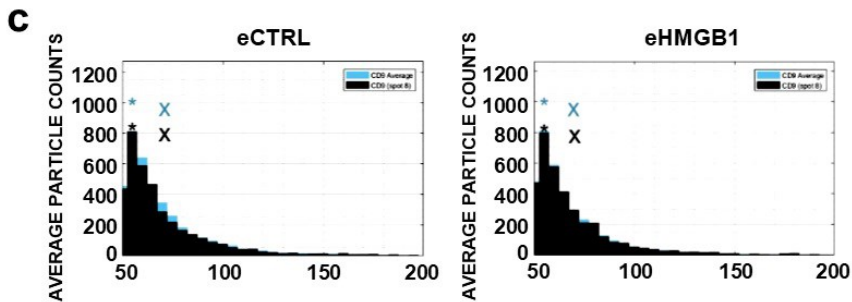

Supplement: d0lc01323d4.pdf [file d0lc01323d4.pdf]

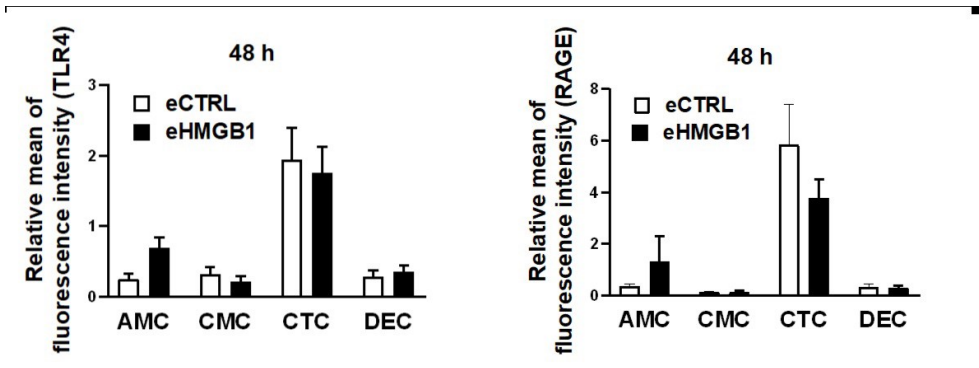

Supplement: d0lc01323d7.pdf [file d0lc01323d7.pdf]
